# Supplementary material
Source: MDPI journal article supplement (https://www.mdpi.com/2073-4395/11/10/1954)
Supplement: s1 [file s1]

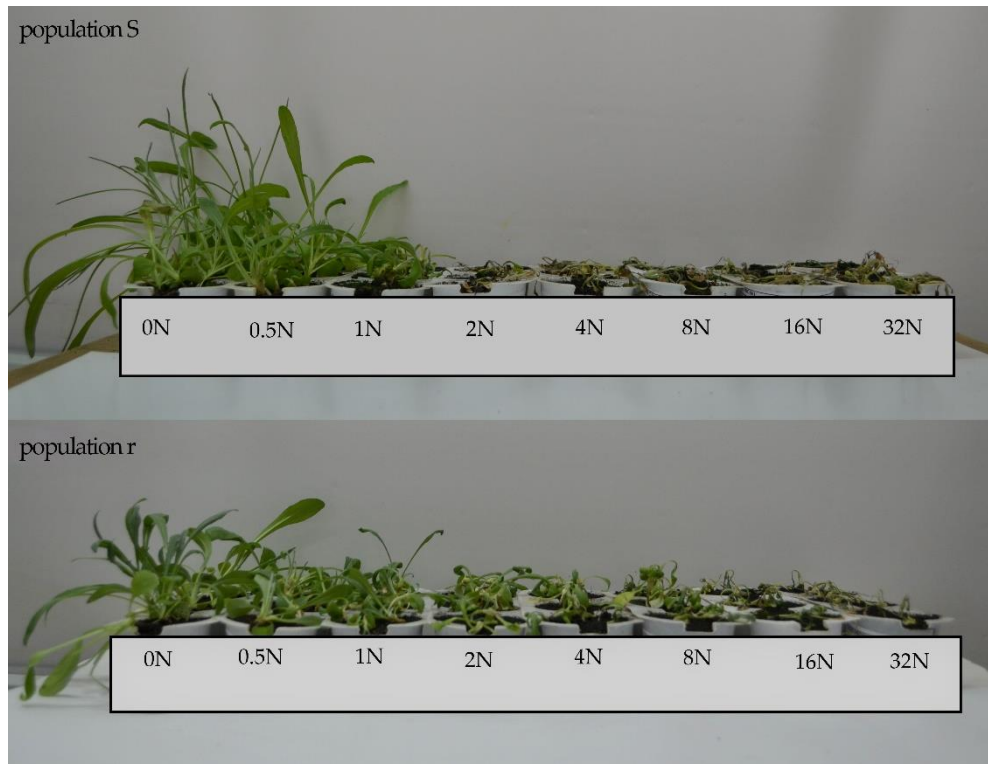

**Figure S1.** Two representative populations of *C. cyanus* with different levels of susceptibility to dicamba: susceptibility (S) and reduced susceptibility (r). N - field dose of herbicide.

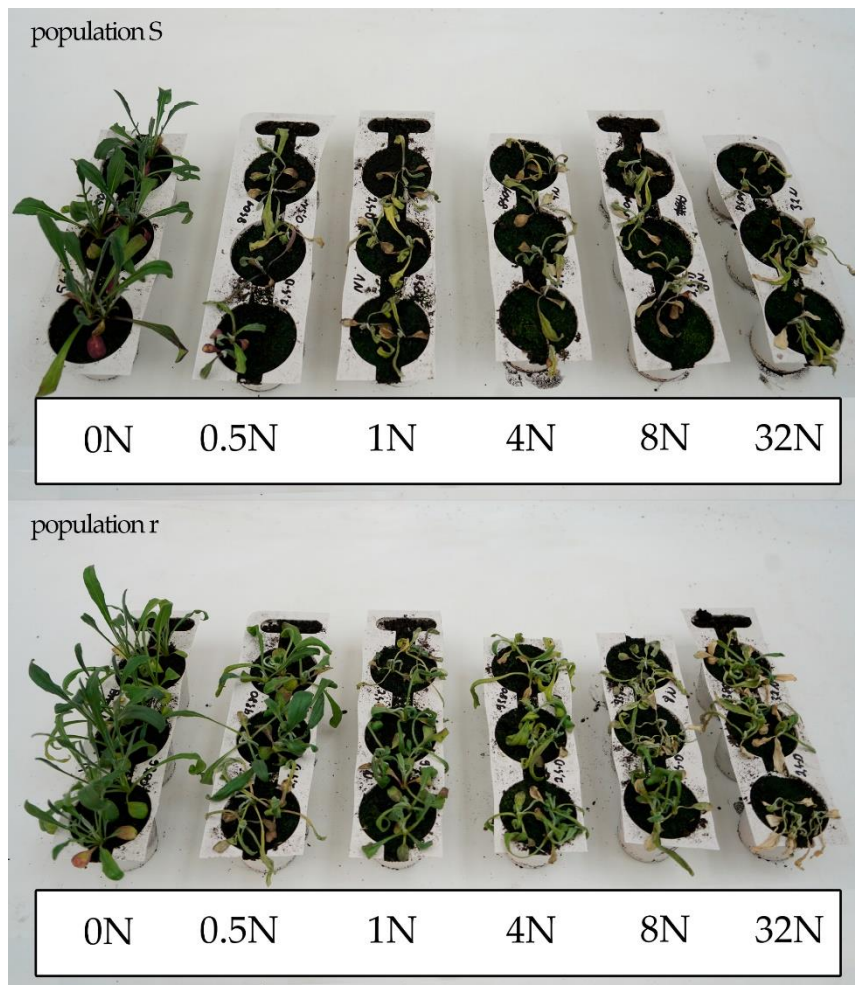

**Figure S2.** Two representative populations of *C. cyanus* with different susceptibilities to 2,4-D: susceptibility (S) and reduced susceptibility (r). N - field dose of herbicide.
